# Supplementary figures and images for: Transcript Variants of Genes Involved in Neurodegeneration Are Differentially Regulated by the Apoe and Mapt Haplotypes
Source: Preprints.org preprint supplement (doi:10.20944/preprints202101.0149.v1), 2021-01-08

Figure 1S: Circos plots of all analysed loci

APOE

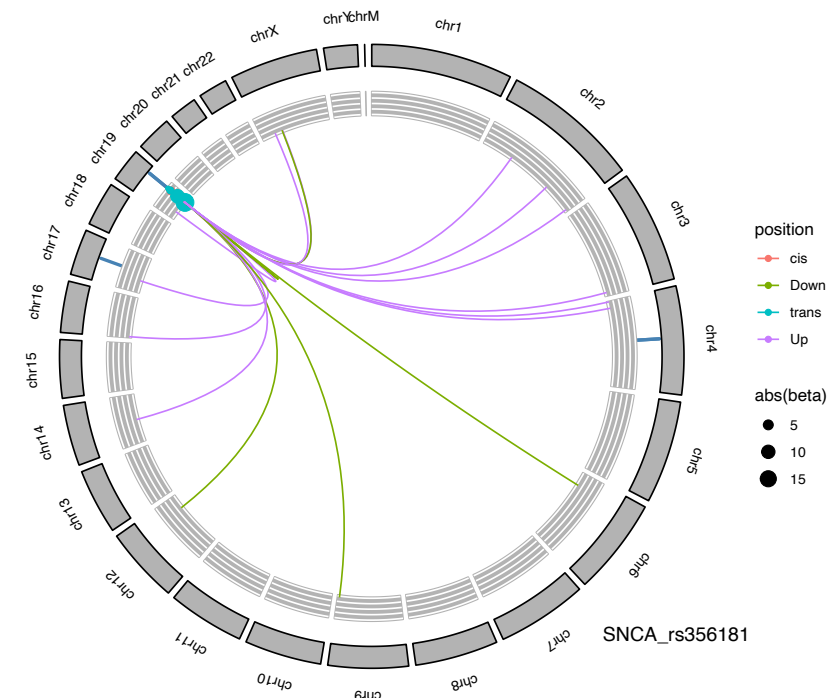

APOE\_e4

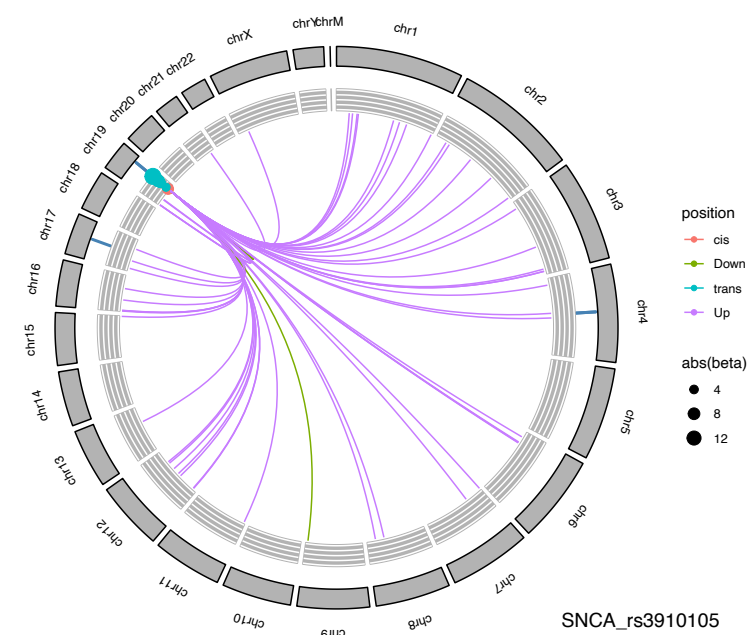

MAPT

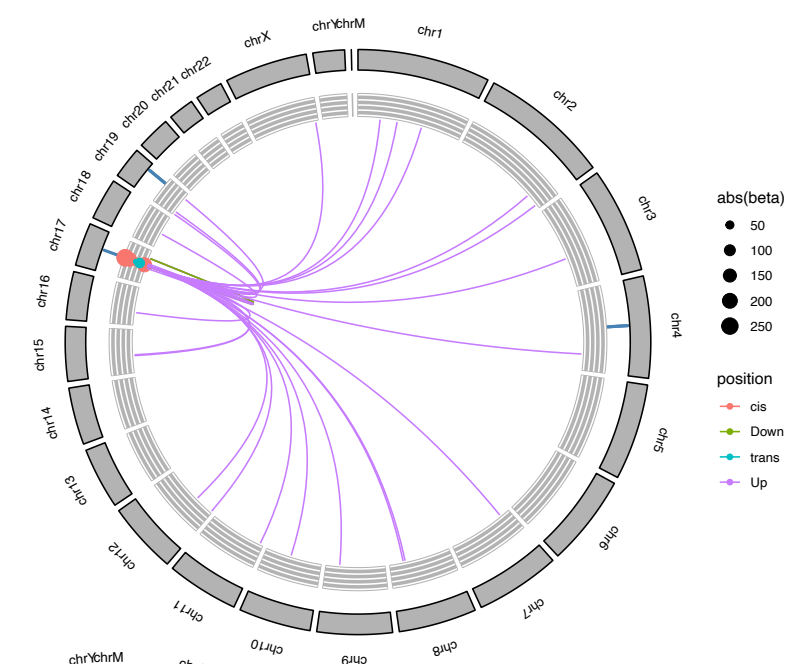

SNCA\_rs356181

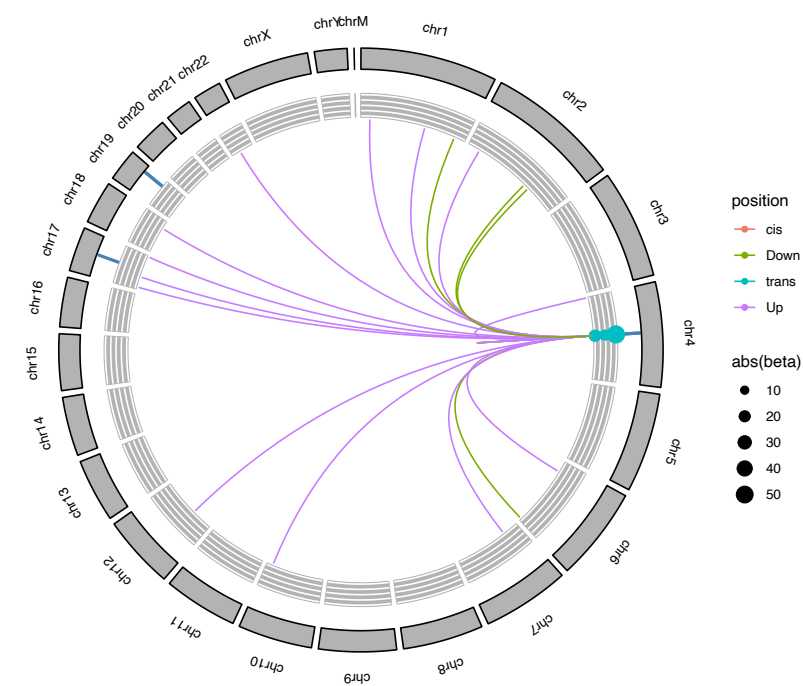

SNCA\_rs3910105

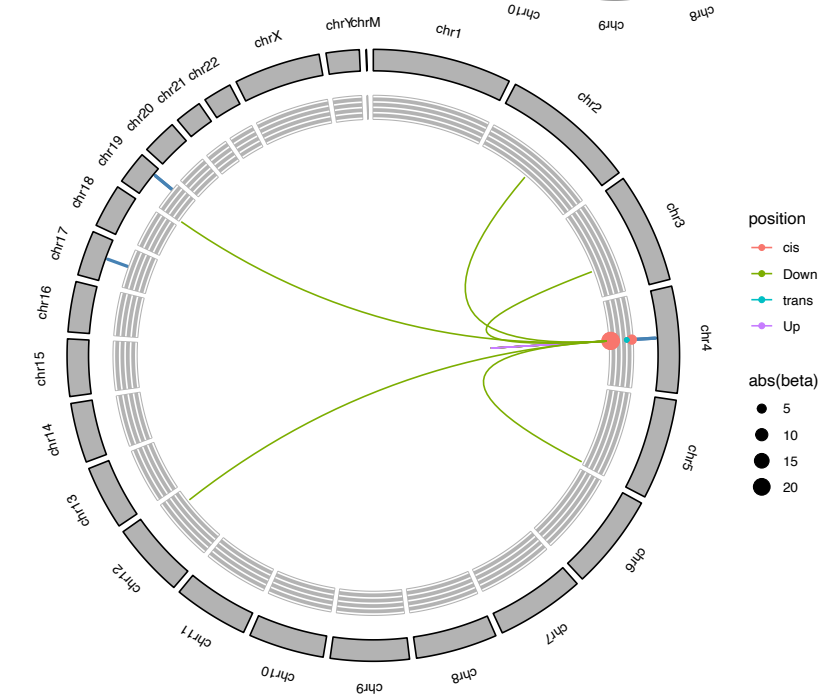

Supplement: Supplementary file 2 [file supplementary]
